# Supplementary material
Source: PubMed Central journal article supplement (PMC5733609)
Supplement: 10.1074_M117.802553_jbc.M117.802553-1.pdf [file 10.1074_M117.802553_jbc.M117.802553-1.pdf]

### Supplemental Figure 1

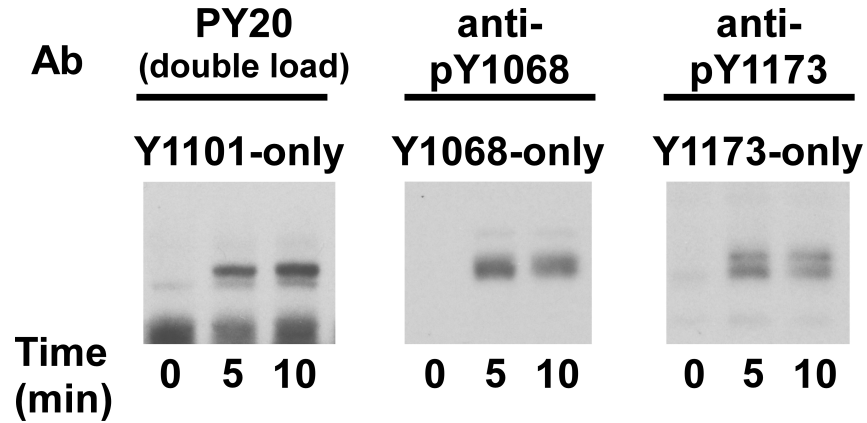

**Western blotting for autophosphorylation of the Y1101-only, Y1068-only and Y1173 only EGF receptors.** Cells expressing the indicated single-Tyr EGF receptors were treated in the absence or presence of 10 nM EGF for the indicated time and RIPA lysates prepared. Left panel) A double load of the lysate from cells expressing the Y1101-only EGF receptor was probed with the anti-phosphotyrosine antibody PY20. Middle panel) A standard load of lysate from cells expressing the Y1068-only EGF receptor was blotted using the site-specific anti-pY1068 antibody. Right panel) A standard load of lysate from cells express the Y1173-only EGF receptor was blotted using the site-specific anti-pY1173 antibody.
